# Supplementary material for: Mycelial pellet as the biomass carrier for semi-continuous production of bioflocculant
Source: Royal Society of Chemistry journal article supplement (doi:10.1039/c3ra41725e), 2013-01-01

## Supporting Information

**Fig. S1** The comparison between free bacteria and combined mycelial pellet

**Fig. S2** The growth of mycelial pellet in different media from one to seven days  
(The left pictures with brown pellets were the growth in medium for bacteria and the right ones with white pellets were in medium for fungi in every lines)

**Fig. S3** Culumi volume and dry weight of mycelial pellet in different media

**Fig. S4** Comparison of biomass and bioflocculant yield between simultaneous culture and adsorption method for immobilization of bioflocculant-producing bacteria

**Fig. S5** The immobilization efficiency of different carriers

**Fig. S1**

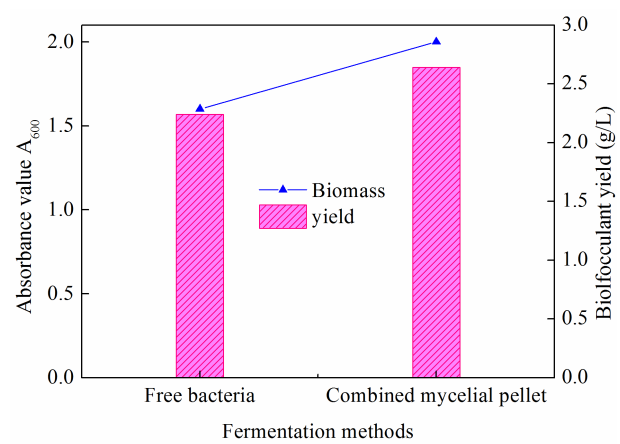

**Fig. S2**

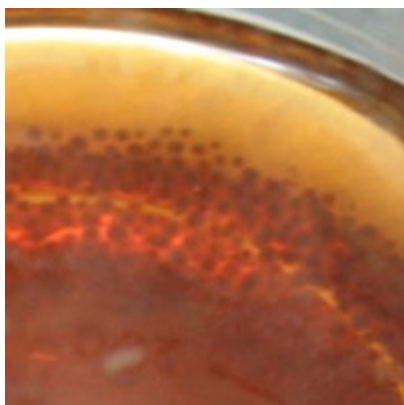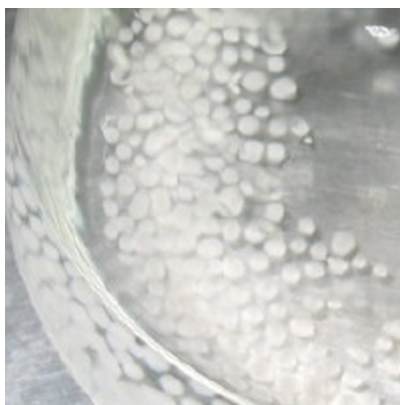

One day

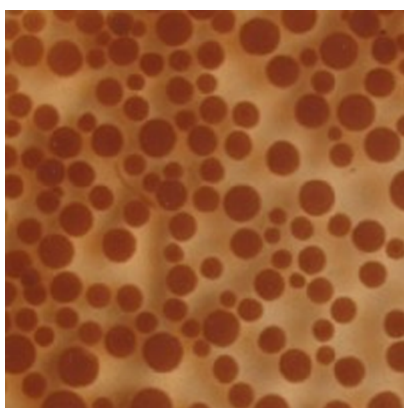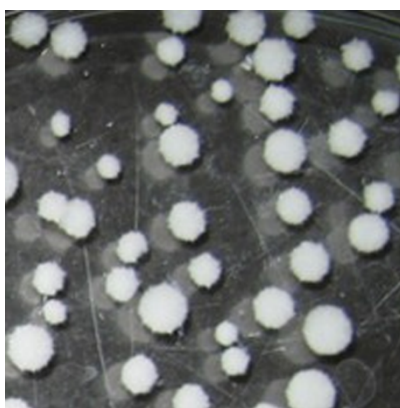

Two days

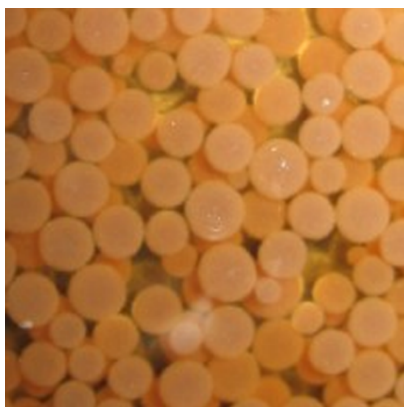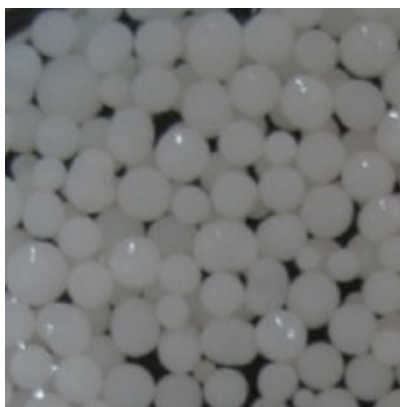

Three days

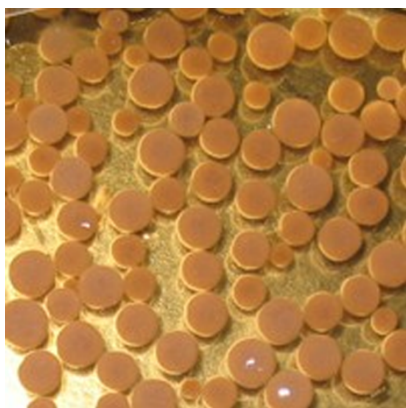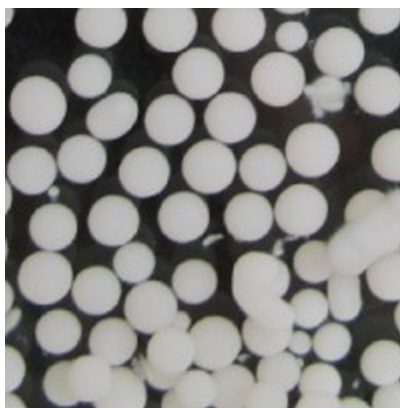

Four days

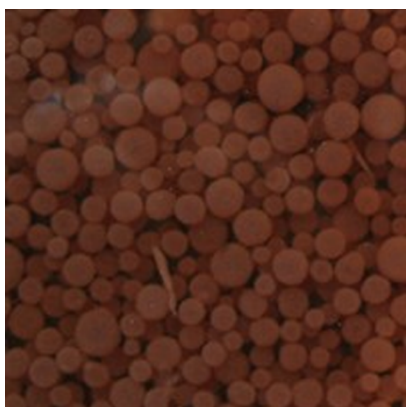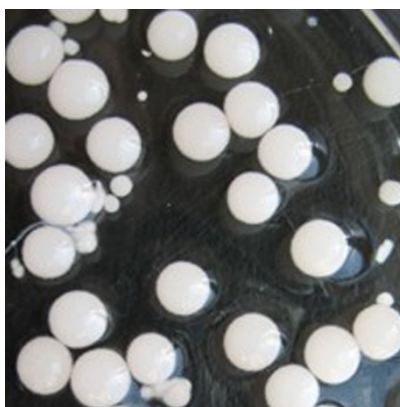

Five days

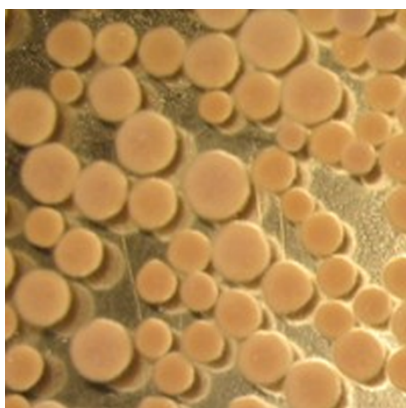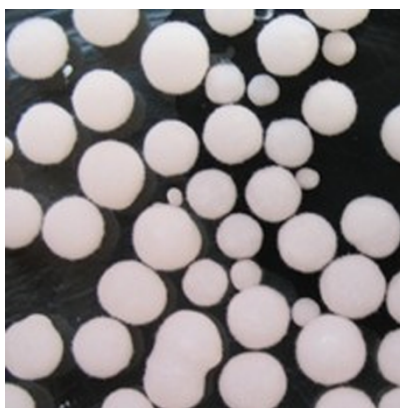

Six days

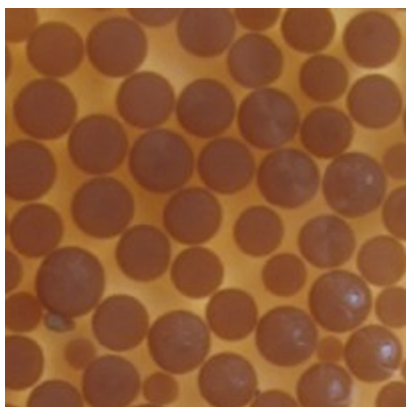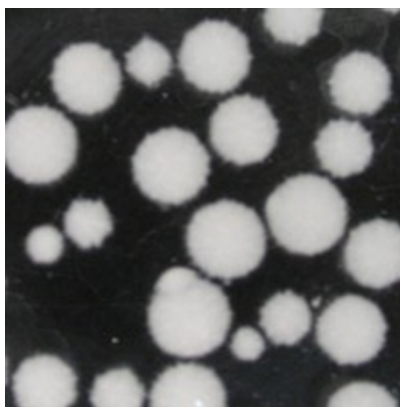

Seven days

**Fig. S3**

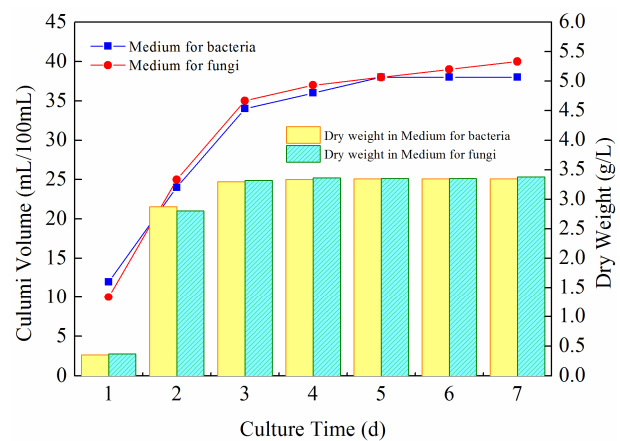

**Fig. S4**

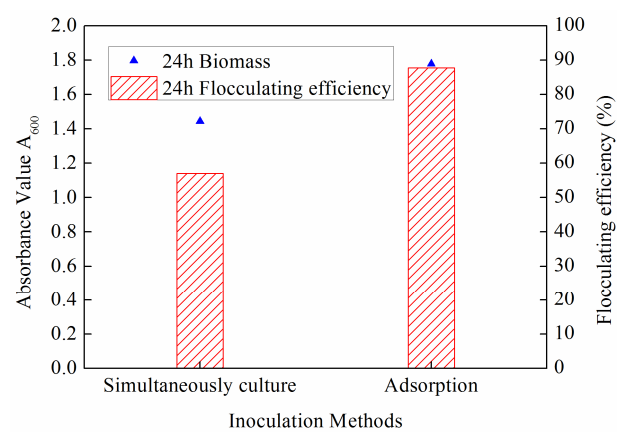

**Fig. S5**

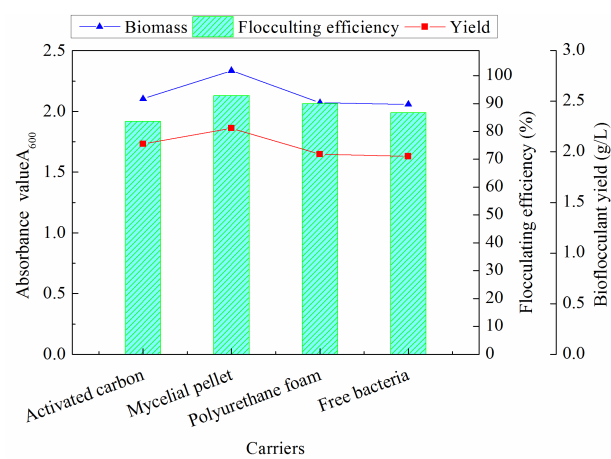

Supplement: c3ra41725e.pdf [file c3ra41725e.pdf]
